# Supplementary material for: Intermittent Theta Burst Stimulation Ameliorates Cognitive Deficit and Attenuates Neuroinflammation via PI3K/Akt/mTOR Signaling Pathway in Alzheimer’s-Like Disease Model
Source: PubMed Central journal article supplement (PMC9152158; doi:10.3389/fnagi.2022.889983), 2022-05-17
Supplement: Image_1.pdf [file Image_1.pdf]

*Supplementary Material*

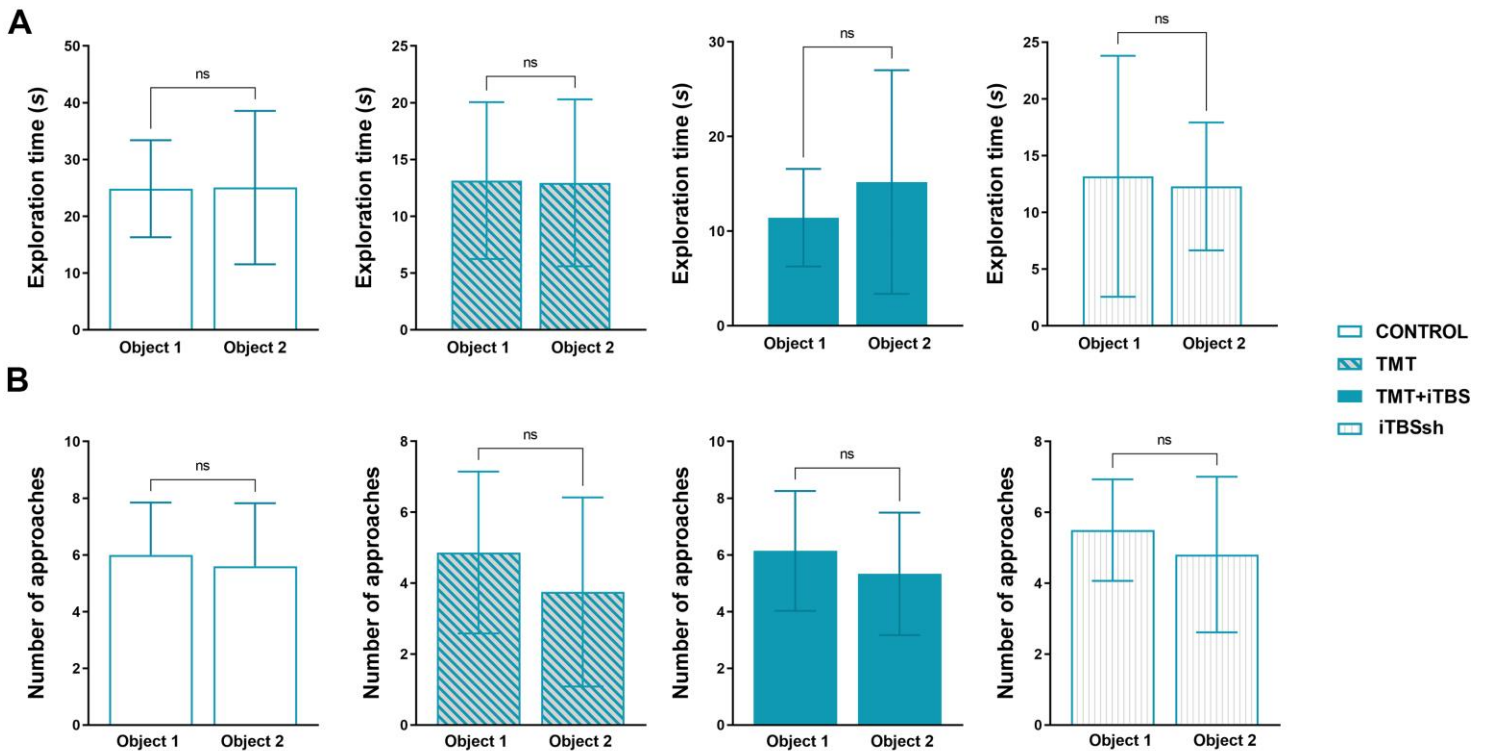

Supplementary Figure 1. Results of sample phase of Novel object recognition test

(A) Exploration time (s) rats spent at two identical objects named Object 1 and Object 2. (B) Number of approaches to Object 1 and Object 2. No statistical difference was observed in all examined group in both exploration time and number of approaches. Results of *post hoc* Tukey's test and significance shown inside graphs, \* $p < 0.05$ , \*\* $p < 0.01$ , \*\*\* $p < 0.001$ , \*\*\*\* $p < 0.0001$ , ns- no significance.
